# Supplementary material for: Prevalence of asymptomatic urinary tract infections in morbidly obese dogs
Source: PeerJ. 2016 Mar 14;4:e1711. doi: 10.7717/peerj.1711 (PMC4793314; doi:10.7717/peerj.1711)
Supplement: Supplemental Information 1 — Subject signalment, BCS, and urinalysis findings. [file peerj-04-1711-s001.xlsx]

## Sheet: Sheet1
Name	UT ID	DOB	Gender	Breed	Body Fat	UTI?	study date	prior antibiotics	antibiotic	Bacteria species	colony counts	RBC	WBC	Protein	Ph	SG
1	175497	2005-06-06	m	boxer	17	no	2008-09-26	no		na	na	0-1	4-6	trace	6.5	1.023
2	184445	1998-01-01	nm	mix	20.4	no	2009-11-18	no		na	na	0-2	rare	neg	6.5	1.023
3	187423	1999-01-01	nm	dachund	28.3	no	2008-09-24	no		na	na			trace	7.0	1.040
4	184345		fs	french bull				no		na	na	10-20	rare	trace	6.0	1.042
4	184345	2003-01-01	fs	french bull	34.3	no	2008-10-10	no		na	na	rare	0	neg	7.5	1.030
5	172259	2005-01-01	nm	hound mix	27.2	no	2009-11-04	no		na	na	0	rare	neg	6.5	1.028
6	207476	2007-12-16	fs	mix	29	no	2009-11-02	no		na	na	0	rare	trace	7.5	1.052
7	138178	2000-03-01	nm	lab	36.3	no	2008-08-28	no		na	na	4-8	2-3	1+	7	1.056
8	200004	2002-05-01	nm	min pin	38.1	no	2008-08-28	no		na	na	rare	rare	2+	7.0	1.043
9	200998	1998-01-01	fs	Aussie	38.2	no	2008-09-25	no		na	na	rare	rare	trace	6.0	1.044
10			fs	lab		no		no		na	na	rare	0	neg	6.0	1.016
10	160550	2004-01-01	fs	lab	39.1	no	2008-09-03	no		na	na	0	rare	1+	6.0	>1.060
11	193909	2007-08-01	fs	dachund	39.6	no	2008-09-23	no		na	na	0	rare	1+	6.0	1.052
12	176048	2000-01-01	fs	lab	39.7	no	2008-09-22		cephalexin 8/4/08	na	na	0	rare	trace	6.5	1.045
13	159820	2001-01-01	fs	sheltie	40.3	no	2008-09-23	no		na	na	TNTC	0	1+	6.5	1.054
14	161585	1997-01-01	ms	curlie retriever	40.4	no	2008-09-08	no		na	na	0	0-2	3+	7.0	1.044
15	199998	2002-01-01	fs	lab	40.5	no	2008-08-25	no		na	na	0	rare	trace	7.5	1.037
16	144035	2001-07-01	nm	jack russell	42.3	no	2008-09-23	no		na	na	0	0	trace	6.0	1.046
17	200003	1997-05-01	f	min pin	42.7	no	2008-08-28	no		na	na	rare	rare	trace	8.0	1.030
18	161509	1997-01-01	nm	shephard	43	no	2008-09-09	no		na	na	rare	rare	1+	7.0	1.033
19	192055	2005-04-14	nm	mix	40.4	no	2009-11-04	no		na	na	0-2	rare	neg	6.5	1.023
20	186536	1998-01-01	fs	mix	35.5	no	2009-11-04	no		na	na	0	rare	neg	7.5	1.017
21	201653	2006-01-01	fs	boxer	38.1	no	2009-11-18	no		na	na	0	0-1	1+	6.5	1.060
22	201566	2008-04-01	fs	golden	39.4	no	2009-11-17	no		na	na	0-1	1-2	trace	8.5	1.035
23	204073	2004-01-01	fs	border collie	45.4	yes	2009-11-18	no		Beta-Hemolytic streptococcus	15,000 CFU/mL	0-2	rare	trace	7.0	1.020
								no		Staphylococcus Pseudintermedius	10,000 CFU/mL
24	200078	2004-01-01	nm	mixed	45.2	no	2008-08-28	no		na	na	50-60	1-2	2+	7.0	1.035
25	200848	2005-02-01	fs	mixed	45.6	no	2008-09-24	no		na	na	0-2	0	1+	7.5	1.048
26	200162	2002-07-01	fs	chihuahua	46.6	no	2008-09-04	no		na	na	rare	0-1	1+	7	1.048
27	144717	2009-07-01	nm	corgi	47.5	no	2008-08-29	no		na	na	rare	0	neg	7.5	1.022
28	146289	2001-01-01	fs	beagle	48.2	yes	2008-09-12	no		Escherichia Coli	>100,000 CFU/mL	rare	TNTC	1+	7.0	1.027
28								no		Proteus Mirabilis	few colonies
29	142684	1997-01-01	fs	mastiff	48.2	no	2008-09-11	no		na	na	0	rare	2+	7.5	1.030
30	197643	2006-01-01	nm	stafshire terrier	48.2	no	2008-09-18	no		na	na	rare	rare	neg	6	1.011
31	201170	2001-06-01	fs	bosten	48.3	no	2008-10-02	no		na	na	0-2	rare	neg	6.5	1.036
32	186084	1999-11-01	fs	Lab	48.4	no	2008-09-11	no		na	na	rare	rare	2+	7.0	1.051
33	165184	2000-01-01	nm	mix	48.6	no	2008-08-28	no		na	na	0	rare	trace	6.0	1.037
34	198760	2004-09-01	nm	dob	50.9	yes	2008-09-26	no		Beta-Hemolytic streptococcus	>100,000 CFU/mL	0	0	neg	7.5	1.007
35	199996	2002-02-01	nm	golden	51	no	2008-08-27	no		na	na	rare	0	trace	6.0	1.045
36	156214	2000-01-01	fs	rott	52.6	no	2008-08-28	no		na	na	0	rare	1+	7.5	1.038
37	188684	1999-01-01	fs	aussie	53.2	no	2008-08-29	no		**** culture and UA 3 weeks apart	na	0-2	0-1	3+	6.5	1.045
38	114799	1997-09-01	fs	beagle	53.4	yes	2008-09-29	no		100,000 CFU/ml ENTEROCOCCUS, NOS	100000	rare	2-3	2+	8	1.048
39	195633	2002-02-01	fs	lab	54.2	no	2008-08-25	no
40	191353	2002-01-01	nm	dob	50.6	no	2009-11-13	no
41	188271	2007-01-01	nm	golden	46.7	no	2009-11-17	no
42	200020	2004-01-01	fs	dachund	56.4	no	2008-09-09		2008-08-25
43	198242	1998-07-01	fs	sheltie	56.9	no	2008-08-26	no
44	200077	2001-11-01	nm	shitzu	59.3	yes	2008-08-28		2008-08-28	3,000 CFU/ml ESCHERICHIA COLI 2. 2,000 CFU/ml GRAM NEGATIVE RODS E. coli and gram negative rods	3,000 CFU/2000CFU	0-2	2-3	3+	6.0	1.045
45	200338		fs	jack russell	63.7	yes	2008-08-28		Baytril 9/08/2008	Escherichia Coli	>100,000 CFU/mL	rare	3-5	2+	7.0	1.025
46	210149	2000-01-01	fs	shitzu	56.9	no	2009-11-12	no
Summary	# tested
<35% body fat	6
>35% body fat	43
>45% body fat	25
